# Supplementary material
Source: PubMed Central journal article supplement (PMC5860882)
Supplement: NIHMS948605-supplement-Supplemental.pdf [file NIHMS948605-supplement-Supplemental.pdf]

ONLINE SUPPLEMENTARY DATA

Supplementary Table 1. Cytokines, chemokines and growth factors measured by multiplexed bead-based Luminex assay.

|                                  |                                 |                                         |               |
|----------------------------------|---------------------------------|-----------------------------------------|---------------|
| EGF                              | IL-12p40                        | IL-5                                    | PDGF-AA       |
| Eotaxin (CCL11)                  | IL-12p70                        | IL-6                                    | PDGF-AB/BB    |
| FGF-2                            | IL-13                           | IL-7                                    | RANTES (CCL5) |
| Flt-3 ligand                     | IL-15                           | IL-8 (CXCL8)                            | TGF- $\alpha$ |
| Fractalkine (CX3CL1)             | IL-17A                          | IL-9                                    | TNF- $\alpha$ |
| G-CSF                            | IL-1RA                          | IP-10 (CXCL10)                          | TNF- $\beta$  |
| GM-CSF                           | IL- <b>1<math>\alpha</math></b> | MCP-1 (CCL2)                            | VEGF          |
| GRO (CXCL1)                      | IL- <b>1<math>\beta</math></b>  | MCP-3 (CCL7)                            | sCD40L        |
| IFN- <b><math>\alpha</math>2</b> | IL-2                            | MDC (CCL22)                             | CXCL4 (PF4)   |
| IFN- <b><math>\gamma</math></b>  | IL-3                            | MIP- <b>1<math>\alpha</math></b> (CCL3) | CRP           |
| IL-10                            | IL-4                            | MIP- <b>1<math>\beta</math></b> (CCL4)  | L-selectin    |

Supplementary Table 2. SSc-associated antigens printed on microarray.

| Antigen             | Vendor          | Cat No.         |
|---------------------|-----------------|-----------------|
| b2GP I              | Diarect         | A14901          |
| Cardiolipin         | Sigma           | C0563           |
| CENP A              | Diarect         | A16901          |
| CENP B              | Diarect         | A16901          |
| Collagen I          | MBL             | JM-4796-10      |
| Collagen V          | Abcam           | ab7537          |
| EBV EBNA-1          | Prospec         | EBV-276         |
| Fibrallarin         | Ray Biotech     | 228-12583-2     |
| IL-6                | Ebiosciences    | 14-8069-62      |
| Ku 70               | Abnova          | H00002547-P01   |
| La/SSB              | Diarect         | A12801          |
| MPO                 | Arotech         | ATM01-10        |
| NPM1 (B23)          | BioVision Inc   | 7258-20         |
| PDGFR-B             | Sino Biological | 10514-H08H      |
| PM/Scl 100          | Diarect         | A16001          |
| PM/Scl 75           | Diarect         | test lot 1137/2 |
| PR3                 | Diarect         | 18601           |
| RNA Pol III         | Fitzgerald      | 80R-2507        |
| Ro52                | Diarect         | A12701          |
| Scl-70 full         | Diarect         | A12401          |
| Scl-70 processed    | Diarect         | A14501          |
| Sp 100              | Diarect         | A18901          |
| TPO (Thyropoxidase) | Diarect         | A12101          |
| U1-snRNP 68 protein | Diarect         | A13001          |
| U1-snRNP A protein  | Diarect         | A13101          |
| U1-snRNP C protein  | Diarect         | A13201          |
| U11/U12 RNP         | Abnova          | H00011066-P01   |
| Whole Histone       | Immunovision    | HIS-1000        |
| GAH IgG control     | Jackson Immuno  | 109-005-098     |

Supplementary Table 3. Baseline clinical variables used as input for elastic net algorithm.

|                                                            |                                            |
|------------------------------------------------------------|--------------------------------------------|
| Age                                                        | SF36 (short form 36 health survey)*        |
| Gender                                                     | VAS (visual analog scale)                  |
| Race/ethnicity                                             | RNAP (RNA polymerase III antibody)         |
| Disease duration                                           | ANA (antinuclear antibody)                 |
| FVC (forced vital capacity)                                | ACA (anticentromere antibody) <sup>†</sup> |
| DLCO (diffusing capacity of the lung for CO <sup>‡</sup> ) | Scl-70                                     |
| Hgb (hemoglobin)                                           | MRSS (modified Rodnan skin score)          |
| PLT (platelet count)                                       | ILD (interstitial lung disease)            |
| WBC (white blood cell count)                               | Ulcers                                     |
| ESR (erythrocyte sedimentation rate)                       | Arthritis                                  |
| CPK (creatine phosphokinase)                               | Renal                                      |
| PGA (physician global assessment)                          | GI (gastrointestinal)                      |
| SHAQ (scleroderma HAQ <sup>#</sup> )                       | Tendon                                     |

\*Mental and physical components were included separately. <sup>†</sup>ACA measurements were removed prior to imputation, as they were only measured for 8 individuals in the imatinib trial. <sup>‡</sup>Carbon monoxide, <sup>#</sup>health assessment questionnaire.

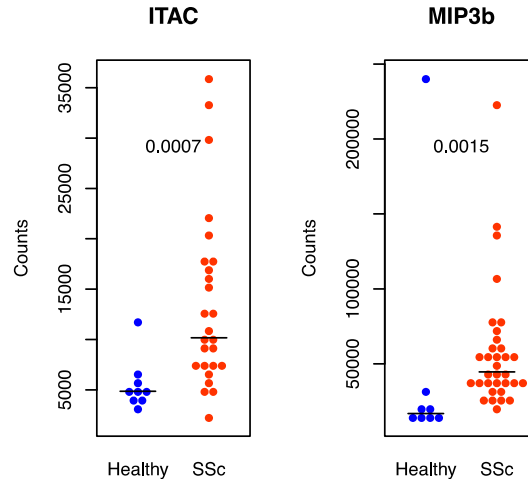

Supplementary Figure 1. Increased levels of interferon-related inflammatory chemokines in the sera of dcSSc patients. The levels of ITAC and MIP3B in the baseline sera of individuals with dcSSc and healthy controls were measured by capture ELISA. Bars represent the group medians. Mann-Whitney tests were used to compare groups, and p-values are shown on each plot.

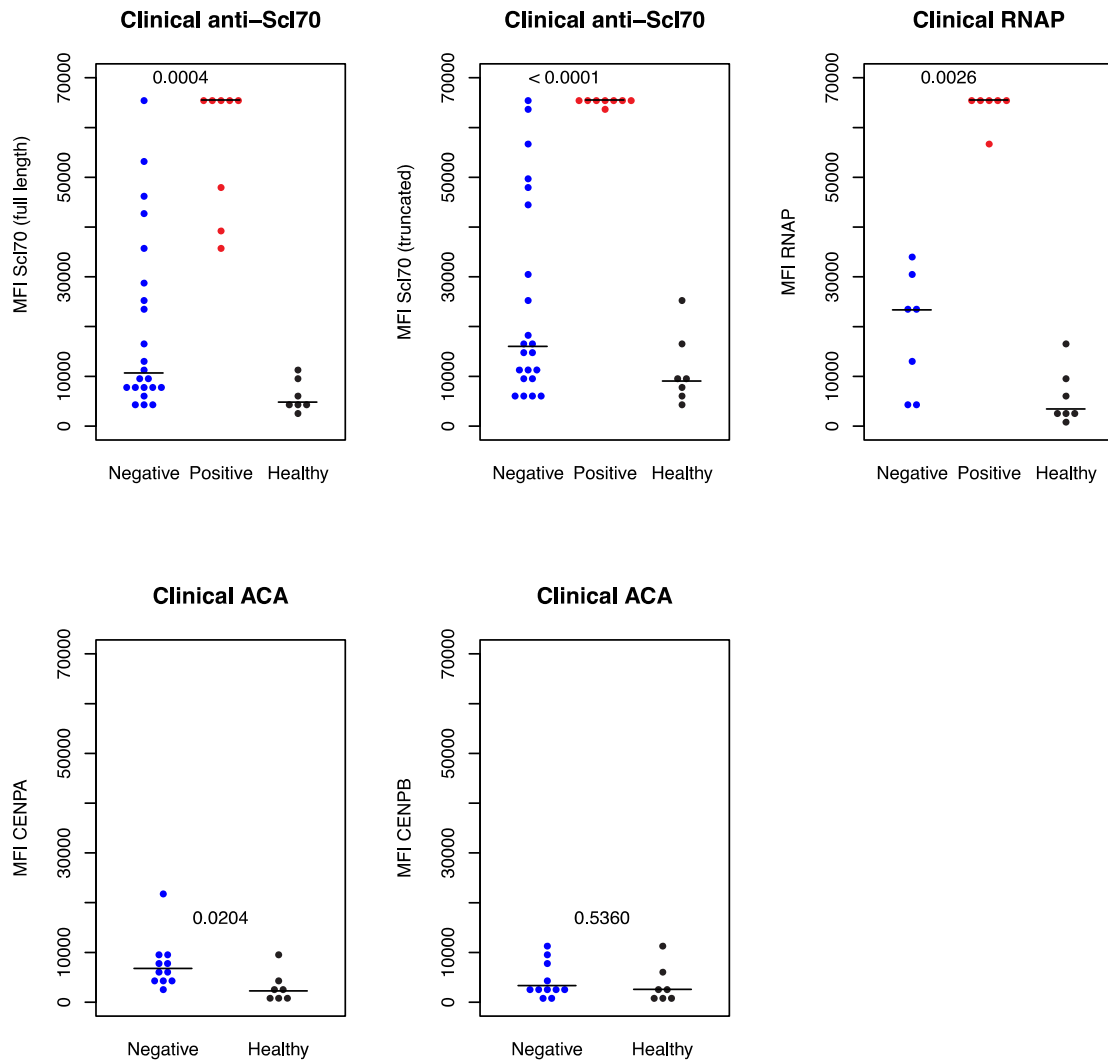

Supplementary Figure 2. Comparison of clinical autoantibody tests with autoantigen microarray results. Patients were divided based on Scl-70, Anti-centromere antibodies (ACA) and RNA Pol III (RNAP) clinical antibody test results at time of sampling, and autoantigen microarray values for the corresponding autoantigens were plotted to test the agreement between platforms. ACA and RNA Pol III tests were only performed on subsets of patients. The p-values of Mann-Whitney tests are shown on each plot. Reactivity to CENP-A and -B was expected to be low, as all patients tested had dcSSc.

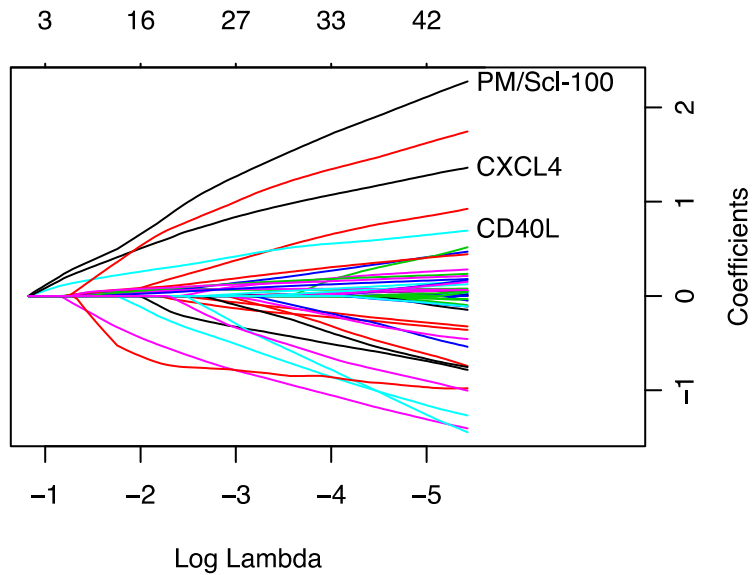

Supplementary Figure 3. Trace plot of coefficients fit by elastic net. Lines corresponding to coefficients of variables used in the signature are labeled on the right. Number of variables (at a given penalty value) are shown on the upper x-axis.
